# Supplementary material for: Simulation Performance of Temperature and Precipitation in the Yangtze River by Different Cumulus and Land Surface Schemes in RegCM4
Source: MDPI journal article supplement (doi:10.3390/atmos15030334), 2024-03-08
Supplement: s1 [file s1]

Archive with 1 entries (1 files):
- atmosphere-2821689-supplementary.pdf
